# Supplementary material for: The Mediating Role of Coach-Athlete Relationship in Linking Talent Development Environment to Swimmer Burnout: A Cross-Sectional Study
Source: Research Square preprint supplement (doi:10.21203/rs.3.rs-6966955/v1), 2025-10-08
Supplement: Supplementary file 1 [file 124c0686c674ffc6c4028616.docx]

Appendix 1. Details of athlete samples

| **Variable** | **N(%)** | **International Master** | **Master** | **Division I** | **Division II** | **Division III** |
| --- | --- | --- | --- | --- | --- | --- |
| Gender |  |  |  |  |  |  |
| Male | 190(59.4) | 3(0.9) | 49(15.3) | 87(27.2) | 41(12.8) | 10(3.1) |
| Female | 130(40.6) | 4(1.3) | 33(10.3) | 65(20.3) | 24(7.5) | 4(1.3) |
| Age |  |  |  |  |  |  |
| 13 | 23(7.2) | / | 3(0.9) | 9(2.8) | 11(3.4) | / |
| 14 | 27(8.4) | 1(0.3) | 2(0.6) | 12(3.8) | 11(3.4) | 1(0.3) |
| 15 | 17(5.3) | / | 5(1.6) | 10(3.1) | 1(0.3) | 1(0.3) |
| 16 | 23(7.2) | / | 8(2.5) | 13(4.1) | 2(0.6) | / |
| 17 | 23(7.2) | / | 4(1.3) | 16(5.0) | 3(0.9) | / |
| 18 | 24(7.5) | / | 11(3.4) | 11(3.4) | 1(0.3) | 1(0.3) |
| 19 | 36(11.3) | 1(0.3) | 9(2.8) | 19(5.9) | 7(2.2) | / |
| 20 | 48(15.0) | 1(0.3) | 13(4.1) | 23(7.2) | 9(2.8) | 2(0.6) |
| 21 | 30(9.4) | / | 10(3.1) | 12(3.8) | 5(1.6) | 3(0.9) |
| 22 | 24(7.5) | 2(0.6) | 8(2.5) | 5(1.6) | 8(2.5) | 1(0.3) |
| 23 | 17(5.3) | 1(0.3) | 6(1.9) | 8(2.5) | 1(0.3) | 1(0.3) |
| 24 | 7(2.2) | / | 1(0.3) | 6(1.9) | / | / |
| 25 | 4(1.3) | / | / | 3(0.9) | 1(0.3) | / |
| 26 | 7(2.2) | 1(0.3) | 1(0.3) | 3(0.9) | 1(0.3) | 1(0.3) |
| 27 | 3(0.9) | / | 1(0.3) | / | 1(0.3) | 1(0.3) |
| 28 | 4(1.3) | / | / | 1(0.3) | 2(0.6) | 1(0.3) |
| 29 | 1(0.3) | / | / | / | 1(0.3) | / |
| 30 | 2(0.6) | / | / | 1(0.3) | / | 1(0.3) |
| Specialty |  |  |  |  |  |  |
| 50 Meters Freestyle | 18(5.6) | 1(0.3) | 2(0.6) | 10(3.1) | 2(0.6) | 3(0.9) |
| 100 Meters Freestyle | 49(15.3) | / | 6(1.9) | 27(8.4) | 15(4.7) | 1(0.3) |
| 200 Meters Freestyle | 12(3.8) | 2(0.6) | 3(0.9) | 5(1.6) | / | 2(0.6) |
| 400 Meters Freestyle | 10(3.1) | / | 1(0.3) | 7(2.2) | 2(0.6) | / |
| 800 Meters Freestyle | 11(3.4) | / | 4(1.3) | 7(2.2) | / | / |
| 1500 Meters Freestyle | 19(5.9) | 1(0.3) | 11(3.4) | 6(1.9) | / | 1(0.3) |
| 50 Meters Backstroke | 9(2.8) | / | 1(0.3) | 5(1.6) | 3(0.9) | / |
| 100 Meters Backstroke | 31(9.7) | 1(0.3) | 9(2.8) | 15(4.7) | 6(1.9) | / |
| 200 Meters Backstroke | 19(5.9) | 1(0.3) | 10(3.1) | 7(2.2) | 1(0.3) | / |
| 50 Meters Breaststroke | 14(4.4) | / | / | 4(1.3) | 8(2.5) | 2(0.6) |
| 100 Meters Breaststroke | 28(8.8) | / | 2(0.6) | 15(4.7) | 10(3.1) | 1(0.3) |
| 200 Meters Breaststroke | 20(6.3) | / | 9(2.8) | 7(2.2) | 2(0.6) | 2(0.6) |
| 50 Meters Butterfly | 11(3.4) | / | 2(0.6) | 5(1.6) | 4(1.3) | / |
| 100 Meters Butterfly | 31(9.7) | / | 5(1.6) | 18(5.6) | 8(2.5) | / |
| 200 Meters Butterfly | 16(5.0) | / | 10(3.1) | 5(1.6) | 1(0.3) | / |
| 200 Meters Individual Medley | 12(3.8) | 1(0.3) | 4(1.3) | 4(1.3) | 2(0.6) | 1(0.3) |
| 400 Meters Individual Medley | 10(3.1) | / | 3(0.9) | 5(1.6) | 1(0.3) | 1(0.3) |
