# Supplementary material for: The Mediating Role of Coach-Athlete Relationship in Linking Talent Development Environment to Swimmer Burnout: A Cross-Sectional Study
Source: Research Square preprint supplement (doi:10.21203/rs.3.rs-6966955/v1), 2025-10-08
Supplement: Supplementary file 2 [file 5ff87e9de693d27233f47915.docx]

**Swimmer Health Survey Questionnaire​​**

Dear Athlete,

Hello! Welcome to the Athlete Health Survey. This questionnaire must be completed by you personally and cannot be filled out by someone else. It will take approximately ​​15 minutes​​ to complete.

The purpose of this survey is to help you better understand yourself and is ​​not​​ intended to evaluate your abilities. There are no right or wrong answers—please respond based on your own feelings and experiences. All information you provide will be used ​​solely for research purposes​​, and your personal details will remain ​​strictly confidential​​. Your honest and thoughtful responses are extremely valuable to us. The insights you share may help improve support for elite athletes in the future.

Please answer all questions truthfully based on your real thoughts and experiences.

Instructions:​​

Mark "✓" in the box "□" next to the answer that best fits your situation.

Fill in the blank "_______" with the appropriate information.

**​Section 1: Basic Information​​**

​​Age:​​ ______ years

​​Gender:​​ □ Male □ Female

​​Ethnicity:​​ □ Han Chinese □ Other ethnic group

​​Height:​​ ______ cm

​​Weight:​​ ______ kg

​​Residence:​​ □ Rural □ Suburban □ Urban

​​Only child?​​ □ Yes □ No

​​Current education level:​​

□ Primary school □ Middle school □ High school

□ College □ Bachelor’s degree □ Master’s degree or higher

**​Section 2: Athletic Background​​**

​​Your athlete level:​​

□ International Master □ National Master

□ First-Class Athlete □ Second-Class Athlete □ Third-Class Athlete

​​Your main swimming event:​​ ___________

​​Freestyle:​​ □ 50m □ 100m □ 200m □ 400m □ 800m □ 1500m

​​Backstroke:​​ □ 50m □ 100m □ 200m

​​Breaststroke:​​ □ 50m □ 100m □ 200m

​​Butterfly:​​ □ 50m □ 100m □ 200m

​​Individual Medley (IM):​​ □ 200m □ 400m

​​Years of specialized training:​​

□ <5 years □ 5–10 years □ >10 years

**Section 3: Athletic Psychological Stress Questionnaire**

Please think back over the last four weeks and respond to each item considering how

often it applied to you.

It was difficult to be around teammates

□Never □Rarely □Sometimes □Often □Always

I found it difficult to do what I needed to do

□Never □Rarely □Sometimes □Often □Always

I was less motivated

□Never □Rarely □Sometimes □Often □Always

I was irritable, angry or aggressive

□Never □Rarely □Sometimes □Often □Always

I could not stop worrying about injury or my performance

□Never □Rarely □Sometimes □Often □Always

I found training more stressful

□Never □Rarely □Sometimes □Often □Always

I found it hard to cope with selection pressures

□Never □Rarely □Sometimes □Often □Always

I worried about life after sport

□Never □Rarely □Sometimes □Often □Always

I needed alcohol or other substances to relax

□Never □Rarely □Sometimes □Often □Always

I took unusual risks off-field

□Never □Rarely □Sometimes □Often □Always

**Section 4: The Coach–Athlete Relationship Questionnaire**

Please describe your feelings about your coach.

I feel close to my athlete/coach

<Strongly Disagree 1□ 2□ 3□ 4□ 5□ 6□ 7□ Strongly Agree>

I feel committed to my athlete/coach

<Strongly Disagree 1□ 2□ 3□ 4□ 5□ 6□ 7□ Strongly Agree>

I feel that my sport career is promising with my athlete/coach

<Strongly Disagree 1□ 2□ 3□ 4□ 5□ 6□ 7□ Strongly Agree>

I like my athlete/coach

<Strongly Disagree 1□ 2□ 3□ 4□ 5□ 6□ 7□ Strongly Agree>

I trust my athlete/coach

<Strongly Disagree 1□ 2□ 3□ 4□ 5□ 6□ 7□ Strongly Agree>

I respect my athlete/coach

<Strongly Disagree 1□ 2□ 3□ 4□ 5□ 6□ 7□ Strongly Agree>

I feel appreciation for the sacrifices my athlete/coach has experienced in order to improve his/her performance

<Strongly Disagree 1□ 2□ 3□ 4□ 5□ 6□ 7□ Strongly Agree>

When I coach my athlete/When I am coached by my coach, I feel at ease

<Strongly Disagree 1□ 2□ 3□ 4□ 5□ 6□ 7□ Strongly Agree>

When I coach my athlete/When I am coached by my coach, I feel responsive to his/her efforts

<Strongly Disagree 1□ 2□ 3□ 4□ 5□ 6□ 7□ Strongly Agree>

When I coach my athlete/When I am coached by my coach, I am ready to do my best

<Strongly Disagree 1□ 2□ 3□ 4□ 5□ 6□ 7□ Strongly Agree>

When I coach my athlete/When I am coached by my coach, I adopt a friendly stance

<Strongly Disagree 1□ 2□ 3□ 4□ 5□ 6□ 7□ Strongly Agree>

**Section 5: Talent Development Environment Questionnaire**

My training is specifically designed to help me develop effectively in the long term.

​​<Strongly Disagree 1□ 2□ 3□ 4□ 5□ 6□ Strongly Agree>

​ My coach emphasises that what I do in training and competition is far more important than winning.

​​​​<Strongly Disagree 1□ 2□ 3□ 4□ 5□ 6□ Strongly Agree>

I spend most of my time developing skills and attributes that my coach tells me I will need if I am to compete successfully at the top/professional level.

​​​​<Strongly Disagree 1□ 2□ 3□ 4□ 5□ 6□ Strongly Agree>

My coach allows me to learn through making my own mistakes.

​​​​<Strongly Disagree 1□ 2□ 3□ 4□ 5□ 6□ Strongly Agree>

I would be given good opportunities even if I experienced a dip in performance.

​​​​<Strongly Disagree 1□ 2□ 3□ 4□ 5□ 6□ Strongly Agree>

My coaches make time to talk to my parents about me and what I am trying to achieve.

​​​​<Strongly Disagree 1□ 2□ 3□ 4□ 5□ 6□ Strongly Agree>

The advice my parents give me fits well with the advice I get from my coaches.

​​​​<Strongly Disagree 1□ 2□ 3□ 4□ 5□ 6□ Strongly Agree>

My progress and personal performance is reviewed regularly on an individual basis.

​​​​<Strongly Disagree 1□ 2□ 3□ 4□ 5□ 6□ Strongly Agree>

I am involved in most decisions about my sport development.

​​​​<Strongly Disagree 1□ 2□ 3□ 4□ 5□ 6□ Strongly Agree>

I regularly set goals with my coach that are specific to my individual development.

​​<Strongly Disagree 1□ 2□ 3□ 4□ 5□ 6□ Strongly Agree>

My coach and I regularly talk about things I need to do to progress to the top level in my sport (e.g., training ethos, competition performances, physically, mentally, technically, tactically).

​​​​<Strongly Disagree 1□ 2□ 3□ 4□ 5□ 6□ Strongly Agree>

My coach and I talk about what current and/or past world-class performers did to be successful.

​​​​<Strongly Disagree 1□ 2□ 3□ 4□ 5□ 6□ Strongly Agree>

My coach and I often try to identify what my next big test will be before it happens.

​​​​<Strongly Disagree 1□ 2□ 3□ 4□ 5□ 6□ Strongly Agree>

My coach explains how my training and competition programme work together to help me develop.

​​​​<Strongly Disagree 1□ 2□ 3□ 4□ 5□ 6□ Strongly Agree>

My coach rarely talks to me about my well-being.

​​​​<Strongly Disagree 1□ 2□ 3□ 4□ 5□ 6□ Strongly Agree>

My coach doesn’t appear to be that interested in my life outside of sport.

​​​​<Strongly Disagree 1□ 2□ 3□ 4□ 5□ 6□ Strongly Agree>

My coach rarely takes the time to talk to other coaches who work with me.

​​​​<Strongly Disagree 1□ 2□ 3□ 4□ 5□ 6□ Strongly Agree>

I don’t get much help to develop my mental toughness in sport effectively.

​​​​<Strongly Disagree 1□ 2□ 3□ 4□ 5□ 6□ Strongly Agree>

I am rarely encouraged to plan for how I would deal with things that might go wrong.

​​​​<Strongly Disagree 1□ 2□ 3□ 4□ 5□ 6□ Strongly Agree>

The guidelines in my sport regarding what I need to do to progress are not very clear.

​​​​<Strongly Disagree 1□ 2□ 3□ 4□ 5□ 6□ Strongly Agree>

I am not taught that much about how to balance training, competing, and recovery.

​​<Strongly Disagree 1□ 2□ 3□ 4□ 5□ 6□ Strongly Agree>

Currently, I have access to a variety of different types of professionals to help my sports development (e.g., physiotherapist, sport psychologist, strength trainer, nutritionist, lifestyle advisor).

​​​​<Strongly Disagree 1□ 2□ 3□ 4□ 5□ 6□ Strongly Agree>

I can pop in to see my coach or other support staff whenever I need to (e.g., physiotherapist, psychologist, strength trainer, nutritionist, lifestyle advisor).

​​​​<Strongly Disagree 1□ 2□ 3□ 4□ 5□ 6□ Strongly Agree>

My coaches talk regularly to the other people who support me in my sport about what I am trying to achieve (e.g., physiotherapist, sport psychologist, nutritionist, strength and conditioning coach, lifestyle advisor).

​​​​​​<Strongly Disagree 1□ 2□ 3□ 4□ 5□ 6□ Strongly Agree>

Those who help me in my sport seem to be on the same wavelength as each other when it comes to what is best for me (e.g., coaches, physiotherapists, sport psychologists, strength trainers, nutritionists, lifestyle advisors).

​​<Strongly Disagree 1□ 2□ 3□ 4□ 5□ 6□ Strongly Agree>

**Section 6: Athlete Burnout Questionnaire**

I am performing many worthwhile things in the sport

□Never □Rarely □Occasionally □Frequently □Always

I feel so tired from the training that I do not find the energy to do other things.

□Never □Rarely □Occasionally □Frequently □Always

The effort I need to put into sport would be better used in more productive activities

□Never □Rarely □Occasionally □Frequently □Always

I feel extremely tired from the sport participation

□Never □Rarely □Occasionally □Frequently □Always

I am not reaching important goals with the sport

□Never □Rarely □Occasionally □Frequently □Always

I am not as concerned about my sport performance as I used to be

□Never □Rarely □Occasionally □Frequently □Always

I am not performing up to my ability in the sport

□Never □Rarely □Occasionally □Frequently □Always

I feel physically and emotionally worn out by sport

□Never □Rarely □Occasionally □Frequently □Always

I am not as interested in sport as I used to be

□Never □Rarely □Occasionally □Frequently □Always

I am physically exhausted by sport

□Never □Rarely □Occasionally □Frequently □Always

I am not as worried about being successful at sports as I used to be.

□Never □Rarely □Occasionally □Frequently □Always

I feel exhausted by the physical and mental demands of the sport

□Never □Rarely □Occasionally □Frequently □Always

It seems that no matter what I do, I don’t perform as well as I should

□Never □Rarely □Occasionally □Frequently □Always

I feel successful at sports

□Never □Rarely □Occasionally □Frequently □Always

I have negative feelings and thoughts towards my sport activity

□Never □Rarely □Occasionally □Frequently □Always
