# Supplementary material for: The Mediating Role of Coach-Athlete Relationship in Linking Talent Development Environment to Swimmer Burnout: A Cross-Sectional Study
Source: Research Square preprint supplement (doi:10.21203/rs.3.rs-6966955/v1), 2025-10-08
Supplement: Supplementary file 3 [file e2381eef56725ea5199f986d.xlsx]

## Sheet: Raw data
age	gender	height	weight	BMI	athletegrade	major	CARTQd1	CARTQd2	HQP	SN	TDEQ	Closeness	Commitment	Complementarity	CARTQ	SRD	PC	EC	APSQ	ABQ1	ABQ2	ABQ3	ABQ4	ABQ5	ABQ6	ABQ7	ABQ8	ABQ9	ABQ10	ABQ11	ABQ12	ABQ13	ABQ14	ABQ15	RSA	PEE	SD	ABQ	APSQ1	APSQ2	APSQ3	APSQ4	APSQ5	APSQ6	APSQ7	APSQ8	APSQ9	APSQ10	CARTQ1
13	1	160	32	12.5	4	8	12	72	-30	24	78	21	35	21	77	4	4	2	10	0	4	4	4	4	4	4	4	4	4	4	4	4	0	0	12	20	16	48	1	1	1	1	1	1	1	1	1	1	7
13	2	180	62	19.1358	3	6	6	40	-14	13	45	12	26	13	51	8	13	2	23	1	2	2	3	2	2	1	1	1	1	1	1	1	2	3	7	8	9	24	2	2	2	2	3	4	3	3	1	1	3
13	2	167	50	17.9282	3	6	12	63	-12	17	80	18	34	21	73	7	12	2	21	1	2	1	2	3	1	2	1	1	1	1	1	2	2	1	10	7	5	22	2	2	1	2	3	3	3	3	1	1	7
13	2	159	49	19.3821	4	2	12	72	-30	24	78	21	35	21	77	6	9	2	17	2	2	1	1	2	2	2	0	0	2	0	0	1	1	0	8	5	3	16	1	2	2	1	3	3	2	1	1	1	7
13	2	161	55	21.2183	3	14	6	41	-15	12	44	9	15	9	33	12	12	6	30	2	2	2	2	2	2	2	2	2	2	2	2	2	2	2	10	10	10	30	3	3	3	3	3	3	3	3	3	3	3
13	2	169	46	16.1059	3	8	7	37	-14	12	42	18	30	18	66	9	13	2	24	1	3	3	3	1	2	2	1	1	3	1	1	1	1	1	6	11	8	25	2	2	2	3	4	4	3	2	1	1	6
13	2	166	60	21.7738	3	5	12	72	-5	24	103	21	35	21	77	7	10	2	19	0	2	0	2	2	1	1	0	0	1	0	1	1	1	0	5	6	1	12	2	2	2	1	2	3	2	3	1	1	7
13	1	174	51	16.845	4	4	8	47	-20	16	51	15	29	18	62	9	7	2	18	2	3	2	3	2	2	2	2	2	2	2	2	3	2	3	11	12	11	34	1	3	3	2	2	3	1	1	1	1	5
13	2	178	62	19.5682	3	14	6	39	-22	8	31	21	35	21	77	11	16	2	29	2	3	2	4	3	0	1	0	0	1	0	3	3	2	3	11	11	5	27	2	3	3	3	5	4	4	3	1	1	7
13	1	161	41	15.8173	4	9	7	47	-17	7	44	17	34	16	67	9	12	2	23	1	2	4	3	2	1	3	0	1	1	1	1	2	2	1	10	7	8	25	2	2	3	2	3	4	2	3	1	1	6
13	2	178	62	19.5682	3	14	4	32	-15	12	33	21	35	21	77	12	12	6	30	2	2	2	2	2	2	2	2	2	2	2	2	2	2	2	10	10	10	30	3	3	3	3	3	3	3	3	3	3	7
13	1	172	54	18.2531	3	4	8	40	-18	15	45	14	27	16	57	9	12	3	24	1	3	2	3	1	1	2	3	1	3	1	3	1	1	1	6	15	6	27	2	2	3	2	4	4	2	2	1	2	5
13	2	156	46	18.902	4	14	11	65	-5	16	87	21	35	21	77	11	14	2	27	1	2	2	2	2	2	2	1	2	2	2	1	2	1	2	8	8	10	26	2	3	3	3	4	4	3	3	1	1	7
13	1	172	56	18.9292	4	11	10	45	-10	16	61	16	27	15	58	9	11	3	23	2	2	2	2	2	2	2	2	2	2	2	2	2	2	2	10	10	10	30	2	2	2	3	3	3	3	2	1	2	6
13	2	150	40	17.7778	4	12	12	59	-12	16	75	16	30	16	62	8	10	2	20	1	2	3	2	3	1	3	2	1	2	0	1	3	3	1	13	9	6	28	1	2	3	2	3	3	3	1	1	1	6
13	2	170	56	19.3772	3	1	11	65	-13	20	83	17	35	21	73	10	13	2	25	1	3	2	2	2	1	1	1	1	2	1	2	1	2	1	7	10	6	23	2	2	3	3	3	4	3	3	1	1	6
13	1	180	64.1	19.784	4	8	12	69	-12	22	91	21	35	21	77	4	10	2	16	0	3	2	4	1	0	0	0	0	0	0	0	0	4	0	5	7	2	14	1	1	1	1	1	3	5	1	1	1	7
13	2	165	50	18.3655	4	11	6	48	-11	10	53	18	35	18	71	8	10	2	20	1	3	3	2	2	1	2	0	0	0	0	0	0	2	0	7	5	4	16	2	2	2	2	3	3	2	2	1	1	7
13	2	165	60	22.0386	4	14	2	12	-5	4	13	18	30	18	66	12	12	2	26	2	2	2	2	3	2	3	2	2	2	2	2	2	2	2	12	10	10	32	3	3	3	3	3	3	3	3	1	1	6
13	2	167	49	17.5697	2	16	8	48	-19	16	53	16	30	17	63	8	8	4	20	0	2	0	3	1	1	1	3	1	1	1	1	1	3	0	6	10	3	19	2	2	2	2	2	2	2	2	2	2	6
13	2	167	54	19.3625	4	11	12	68	-5	20	95	21	35	21	77	7	8	2	17	2	3	1	2	2	1	0	1	0	1	0	1	0	1	1	5	8	3	16	1	2	2	2	3	2	2	1	1	1	7
13	2	159	47	18.591	2	15	12	72	-30	24	78	21	35	21	77	5	9	2	16	0	4	4	1	0	0	0	0	0	0	0	0	0	0	0	0	5	4	9	1	1	2	1	3	4	1	1	1	1	7
13	2	170	57	19.7232	2	6	12	49	-19	14	56	13	31	15	59	10	14	2	26	2	4	2	3	3	2	1	4	1	4	2	3	2	2	1	10	18	8	36	1	3	5	1	4	3	4	3	1	1	4
14	1	175	63	20.5714	5	3	12	72	-15	22	91	21	35	21	77	4	10	2	16	0	4	4	3	1	0	0	0	0	0	0	1	1	1	0	3	8	4	15	1	1	1	1	3	3	3	1	1	1	7
14	2	169	57	19.9573	3	11	12	68	-16	10	74	21	35	21	77	9	7	2	18	0	2	2	0	1	0	0	0	0	0	0	0	1	4	0	6	2	2	10	1	3	2	3	2	2	2	1	1	1	7
14	1	176	60	19.3698	4	12	12	64	-12	20	84	21	35	21	77	6	8	2	16	0	2	3	2	1	0	1	1	0	2	0	1	0	1	0	3	8	3	14	1	2	1	2	3	2	1	2	1	1	7
14	1	188	72	20.3712	3	2	12	70	-28	24	78	21	35	21	77	4	4	2	10	0	0	0	0	0	2	0	0	0	0	0	0	0	0	0	0	0	2	2	1	1	1	1	1	1	1	1	1	1	7
14	2	172	65	21.9713	3	14	8	52	-25	19	54	15	30	18	63	11	16	3	30	2	3	2	3	3	2	3	2	2	3	2	2	4	3	2	15	13	10	38	2	3	4	2	4	5	5	2	2	1	5
14	1	187	69.4	19.8461	3	6	10	48	-29	9	38	15	20	15	50	11	18	2	31	3	4	4	3	4	4	4	2	3	4	4	3	3	3	4	17	16	19	52	1	2	5	3	5	5	3	5	1	1	4
14	1	171.5	51.5	17.5097	4	10	12	68	-9	20	91	17	33	18	68	12	17	2	31	0	4	1	3	3	2	4	2	2	3	1	2	3	0	1	10	14	7	31	3	3	3	3	4	4	4	5	1	1	6
14	2	165	50.9	18.6961	3	8	10	52	-9	12	65	21	35	21	77	4	10	2	16	0	3	3	2	4	0	0	1	4	4	0	2	1	0	0	5	12	7	24	1	1	1	1	5	1	1	3	1	1	7
14	1	178	80	25.2493	4	4	5	41	-15	13	44	5	10	20	35	11	20	5	36	3	4	2	4	2	1	4	4	2	4	2	4	4	4	4	17	20	11	48	5	3	1	2	5	5	5	5	2	3	1
14	1	164	50	18.5901	4	10	12	72	-29	24	79	21	35	21	77	7	7	2	16	1	2	1	1	2	0	3	1	0	1	0	0	1	1	1	8	5	2	15	1	3	2	1	4	1	1	1	1	1	7
14	2	174	58	19.1571	3	17	12	64	-10	19	85	18	35	21	74	17	15	2	34	2	4	3	4	2	0	2	2	1	2	0	4	2	2	2	10	16	6	32	5	4	3	5	4	4	5	2	1	1	7
14	1	185	70	20.4529	4	11	12	67	-6	24	97	21	35	21	77	4	4	2	10	0	1	4	1	1	1	1	1	0	0	0	0	0	0	0	2	3	5	10	1	1	1	1	1	1	1	1	1	1	7
14	1	173	62	20.7157	3	11	12	64	-7	24	93	16	35	21	72	10	15	2	27	2	4	0	2	4	0	2	0	0	1	0	2	2	3	0	13	9	0	22	3	4	2	1	4	3	4	4	1	1	7
14	2	171.5	60	20.3997	3	14	8	37	-30	4	19	6	18	21	45	20	16	3	39	2	1	2	2	4	4	4	4	4	4	4	4	4	2	4	16	15	18	49	5	5	5	5	5	5	5	1	1	2	1
14	2	174	57	18.8268	3	11	12	70	-10	23	95	20	35	21	76	7	11	2	20	1	2	2	1	2	3	3	1	1	1	2	1	1	2	1	9	6	9	24	1	2	2	2	4	2	2	3	1	1	7
14	1	173	70	23.3887	4	2	12	72	-6	12	90	21	34	21	76	7	6	2	15	1	2	1	2	2	1	1	0	1	2	2	0	1	1	0	6	6	5	17	1	2	2	2	2	1	1	2	1	1	7
14	2	169	52	18.2066	3	2	10	70	-12	11	79	17	34	21	72	10	11	2	23	1	2	2	2	3	1	2	0	3	3	2	1	2	3	1	11	8	9	28	2	3	4	1	4	2	3	2	1	1	7
14	1	170	58	20.0692	4	16	8	48	-25	20	51	13	25	15	53	8	7	2	17	2	2	2	2	1	2	1	2	1	1	2	1	1	2	2	7	8	9	24	2	2	2	2	2	2	2	1	1	1	5
14	2	168	51	18.0697	4	8	12	72	-5	24	103	21	35	21	77	4	4	2	10	0	2	1	1	2	1	1	0	0	1	0	1	1	1	0	5	5	2	12	1	1	1	1	1	1	1	1	1	1	7
14	2	163	54	20.3244	4	2	12	72	-5	18	97	21	35	21	77	11	12	2	25	1	2	2	2	2	3	2	1	2	2	2	1	1	2	1	8	8	10	26	3	3	3	2	3	3	3	3	1	1	7
14	1	177	57	18.194	4	11	11	55	-16	14	64	17	31	21	69	5	8	2	15	1	1	1	2	2	1	2	0	1	2	1	0	2	2	1	9	5	5	19	1	1	2	1	2	2	2	2	1	1	6
14	2	176	66	21.3068	2	8	10	47	-15	13	55	15	30	18	63	17	14	2	33	1	3	1	2	3	2	3	4	2	3	2	2	2	2	2	11	14	9	34	3	5	5	4	4	5	3	2	1	1	5
14	1	172	60	20.2812	4	14	6	33	-14	12	37	10	18	12	40	8	8	2	18	2	2	2	2	2	2	2	2	2	2	2	2	2	2	2	10	10	10	30	2	2	2	2	2	2	2	2	1	1	4
14	2	172	56	18.9292	2	15	10	55	-13	20	72	15	30	18	63	8	11	2	21	2	2	2	3	3	2	3	2	3	3	2	3	3	2	2	13	13	11	37	2	2	2	2	3	3	3	2	1	1	6
14	2	180	66	20.3704	1	6	9	41	-9	17	58	19	35	21	75	8	12	2	22	2	1	1	1	2	2	1	0	1	1	1	1	2	1	2	8	4	7	19	1	3	2	2	4	3	3	2	1	1	7
14	2	163	54	20.3244	3	15	10	58	-12	12	68	11	31	15	57	7	9	2	18	2	2	2	1	1	0	1	1	1	1	0	1	1	1	1	6	6	4	16	1	1	2	3	3	3	1	2	1	1	4
14	1	180	70	21.6049	3	11	11	68	-22	17	74	18	35	21	74	8	10	2	20	1	3	0	3	2	0	2	1	1	3	0	2	2	1	1	8	12	2	22	1	2	3	2	3	3	3	1	1	1	7
15	1	176	65	20.984	4	11	12	72	-16	20	88	21	35	21	77	4	11	2	17	1	1	3	3	3	1	1	0	2	1	0	1	2	2	0	9	6	6	21	1	1	1	1	3	2	3	3	1	1	7
15	1	183	74	22.0968	2	8	4	38	-30	8	20	4	16	10	30	16	15	3	34	2	3	1	2	2	1	2	1	1	3	4	3	2	2	3	10	12	10	32	3	4	5	4	5	5	3	2	1	2	1
15	1	182	68	20.5289	3	4	8	47	-15	18	58	15	25	15	55	8	8	4	20	2	2	2	2	2	2	2	1	1	1	2	2	2	2	1	10	8	8	26	2	2	2	2	2	2	2	2	2	2	5
15	2	167	60	21.5139	3	5	12	70	-13	23	92	20	35	21	76	11	14	2	27	1	2	0	1	3	0	4	3	1	2	1	2	4	2	2	14	10	4	28	3	3	3	2	4	3	5	2	1	1	7
15	2	160	45	17.5781	5	1	8	48	-20	16	52	15	25	15	55	5	4	2	11	2	2	2	2	2	2	2	2	2	2	2	2	2	2	2	10	10	10	30	1	2	1	1	1	1	1	1	1	1	5
15	1	176	68	21.9525	3	11	10	60	-15	12	67	18	30	18	66	7	13	3	23	2	3	1	3	2	0	2	1	1	4	1	2	2	2	1	10	13	4	27	2	2	2	1	4	3	3	3	1	2	6
15	1	183	76	22.694	3	17	10	61	-23	19	67	19	34	21	74	10	11	2	23	1	3	2	2	2	1	2	3	1	2	2	3	2	1	2	8	13	8	29	2	2	3	3	4	3	3	1	1	1	6
15	2	175	57.5	18.7755	3	1	9	57	-23	8	51	14	31	19	64	8	10	2	20	1	4	0	3	3	0	3	1	1	2	1	3	2	3	0	12	13	2	27	1	3	3	1	3	3	3	1	1	1	7
15	2	169	52	18.2066	3	11	9	37	-15	5	36	14	31	19	64	11	12	2	25	2	2	0	3	3	1	3	3	3	4	2	4	4	3	2	15	16	8	39	2	2	3	4	3	4	4	1	1	1	6
15	1	185	72	21.0373	3	12	5	34	-18	12	33	9	21	17	47	9	11	2	22	1	2	1	3	2	0	2	3	3	3	3	3	1	1	0	7	14	7	28	1	3	3	2	1	4	4	2	1	1	3
15	1	180	52	16.0494	3	9	10	60	-16	16	70	14	28	15	57	11	11	2	24	1	3	1	3	2	2	2	1	1	1	1	2	1	1	1	7	10	6	23	3	3	3	2	3	3	3	2	1	1	6
15	2	171	58	19.8352	3	17	12	59	-10	16	77	16	30	17	63	8	10	2	20	1	2	1	2	2	1	1	1	1	1	1	2	1	2	2	7	8	6	21	2	2	2	2	3	3	2	2	1	1	6
15	1	188	72	20.3712	2	8	12	65	-12	20	85	21	35	21	77	5	12	2	19	0	1	1	1	2	3	2	1	1	3	1	1	1	1	1	6	7	7	20	1	1	2	1	4	3	3	2	1	1	7
15	2	170	62	21.4533	3	2	11	64	-17	13	71	12	23	12	47	14	12	4	30	2	2	2	2	2	2	2	2	2	2	2	2	2	2	2	10	10	10	30	3	3	4	4	3	3	3	3	2	2	4
15	2	179	56	17.4776	2	9	10	38	-16	7	39	11	30	20	61	13	15	2	30	1	3	2	3	1	1	1	4	2	3	1	3	2	1	1	6	16	7	29	3	2	4	4	4	4	3	4	1	1	6
15	2	171	62	21.2031	2	14	12	67	-23	18	74	20	33	21	74	8	19	2	29	1	2	2	3	3	3	4	2	2	3	3	2	4	3	1	15	12	11	38	2	2	3	1	4	5	5	5	1	1	6
15	1	190	75	20.7756	2	12	12	69	-5	23	99	21	35	21	77	4	11	2	17	1	2	1	1	2	3	1	0	0	1	0	0	0	2	0	6	4	4	14	1	1	1	1	3	3	2	3	1	1	7
16	2	172	59	19.9432	3	11	12	70	-12	19	89	16	27	16	59	5	11	2	18	1	2	1	1	0	1	1	1	1	1	0	0	0	1	1	3	5	4	12	1	1	1	2	4	2	2	3	1	1	6
16	1	183	76	22.694	2	5	10	60	-11	18	77	14	25	18	57	6	12	2	20	2	2	2	4	2	1	2	1	1	2	1	4	2	3	3	11	13	8	32	1	1	3	1	3	4	3	2	1	1	5
16	2	168	65	23.03	3	14	12	69	-7	24	98	20	35	21	76	4	4	2	10	0	2	1	0	2	2	2	0	0	0	0	0	0	1	0	5	2	3	10	1	1	1	1	1	1	1	1	1	1	7
16	2	170	57.5	19.8962	2	6	11	39	-18	7	39	12	26	20	58	10	13	2	25	1	3	1	2	3	2	4	2	1	1	3	2	3	2	1	13	10	8	31	3	2	3	2	4	3	4	2	1	1	5
16	2	172	58	19.6052	3	2	12	71	-11	18	90	21	35	21	77	14	17	2	33	1	3	0	2	3	3	4	4	3	3	2	1	3	3	2	14	13	10	37	2	4	5	3	5	4	4	4	1	1	7
16	2	168	58	20.5499	3	5	6	34	-9	9	40	10	31	20	61	5	10	2	17	1	1	1	1	0	0	2	0	1	1	0	0	1	2	0	6	3	2	11	2	1	1	1	3	3	2	2	1	1	4
16	1	177	63	20.1092	3	4	9	43	-20	15	47	11	19	15	45	11	11	5	27	1	2	1	3	2	2	2	1	2	2	2	2	2	1	2	8	10	9	27	2	3	3	3	2	3	3	3	3	2	4
16	1	185	68	19.8685	3	5	11	56	-11	15	71	18	30	18	66	6	13	2	21	1	3	1	3	2	1	2	2	1	2	1	2	1	1	0	7	12	4	23	1	2	2	1	4	3	3	3	1	1	6
16	1	180	67	20.679	3	6	11	70	-10	20	91	13	34	21	68	9	9	3	21	1	3	1	1	1	1	4	1	1	1	0	1	4	1	1	11	7	4	22	1	2	3	3	3	3	2	1	2	1	3
16	1	184	75	22.1526	3	9	8	63	-10	16	77	18	35	21	74	5	9	2	16	0	1	0	1	1	0	0	0	0	1	0	0	0	2	0	3	3	0	6	1	1	1	2	4	3	1	1	1	1	7
16	1	184	74	21.8573	2	6	8	54	-5	20	77	18	35	21	74	6	13	2	21	0	2	0	4	3	0	1	1	1	2	0	4	1	2	0	7	13	1	21	1	2	1	2	2	4	5	2	1	1	6
16	2	166	54	19.5965	2	9	7	38	-16	14	43	11	26	17	54	7	12	2	21	1	2	2	3	2	2	2	0	1	1	2	2	1	1	1	7	8	8	23	1	2	2	2	3	3	3	3	1	1	4
16	1	175	69	22.5306	2	12	12	63	-22	10	63	12	20	12	44	16	15	6	37	1	3	3	3	3	3	3	3	3	3	3	3	3	1	3	11	15	15	41	4	4	4	4	4	4	4	3	3	3	4
16	1	186	68	19.6555	2	12	8	70	-28	24	74	17	34	19	70	13	16	3	32	1	3	3	1	2	2	2	2	1	3	2	2	2	2	1	9	11	9	29	3	3	4	3	5	3	4	4	2	1	7
16	1	172	55	18.5911	3	2	12	72	-11	24	97	21	35	21	77	14	12	5	31	0	2	0	1	2	0	1	3	1	1	1	1	2	1	1	6	8	3	17	3	3	3	5	4	4	3	1	1	4	7
16	2	163	53	19.9481	4	7	7	72	-30	24	73	21	35	21	77	8	8	2	18	0	1	0	2	2	1	1	0	1	2	1	1	1	1	0	5	6	3	14	1	2	3	2	3	2	2	1	1	1	7
16	2	170	54	18.6851	3	15	10	48	-20	16	54	21	35	21	77	12	12	6	30	2	2	2	2	2	2	2	2	2	2	2	2	2	2	2	10	10	10	30	3	3	3	3	3	3	3	3	3	3	7
16	1	179	73	22.7833	4	8	11	55	-8	14	72	20	35	21	76	12	8	2	22	0	2	1	1	4	0	2	2	0	4	0	0	4	2	2	12	9	3	24	3	4	4	1	3	1	3	1	1	1	7
16	2	166	55	19.9594	3	14	12	65	-25	10	62	12	26	12	50	15	16	3	34	2	3	2	3	2	2	2	3	2	3	2	3	2	2	2	10	15	10	35	4	4	4	3	4	4	4	4	1	2	4
16	2	168	53	18.7783	2	15	9	64	-13	24	84	16	35	21	72	7	12	2	21	0	2	0	1	2	1	2	0	0	0	0	0	0	2	1	6	3	2	11	1	3	2	1	5	3	1	3	1	1	7
16	1	185	75	21.9138	3	12	12	72	-5	24	103	21	35	21	77	5	8	2	15	0	2	0	1	2	1	2	0	1	1	0	0	0	0	0	4	4	2	10	1	1	1	2	2	4	1	1	1	1	7
16	2	175	63	20.5714	2	17	10	60	-9	19	80	17	31	18	66	9	12	2	23	1	2	1	3	2	0	2	1	1	1	2	1	3	2	2	10	8	6	24	2	2	3	2	4	3	2	3	1	1	6
16	1	185	83	24.2513	3	8	12	71	-10	24	97	21	35	21	77	5	6	2	13	0	2	2	2	2	1	1	0	0	1	0	0	0	2	0	5	5	3	13	2	1	1	1	3	1	1	1	1	1	7
17	1	178	72	22.7244	3	16	12	72	-30	24	78	21	35	21	77	5	10	2	17	0	1	1	2	2	0	0	0	0	1	0	0	0	1	0	3	4	1	8	1	1	2	1	3	3	3	1	1	1	7
17	2	160	58	22.6562	4	14	12	72	-9	24	99	19	35	21	75	6	13	2	21	0	3	2	2	3	1	2	2	1	3	0	2	2	2	2	9	12	6	27	1	1	3	1	4	3	3	3	1	1	7
17	1	179	78	24.3438	4	14	12	72	-30	24	78	21	35	21	77	8	12	2	22	1	2	4	2	3	1	3	1	1	1	1	1	3	2	1	12	7	8	27	1	3	2	2	3	3	4	2	1	1	7
17	1	175	68	22.2041	4	14	11	64	-17	24	82	21	35	21	77	15	17	3	35	2	3	4	4	4	4	4	4	3	2	4	4	4	2	3	16	17	18	51	2	4	5	4	5	5	5	2	1	2	7
17	2	167	67	24.0238	3	14	10	48	-19	15	54	12	23	14	49	13	15	3	31	2	3	3	3	3	1	3	3	3	3	2	2	2	3	0	13	14	9	36	3	3	4	3	4	4	4	3	1	2	5
17	1	192	88	23.8715	3	11	12	72	-9	16	91	20	35	21	76	7	12	2	21	0	2	1	2	2	1	1	1	1	1	1	1	1	2	1	6	7	5	18	1	2	2	2	3	3	3	3	1	1	7
17	1	175	70	22.8571	3	8	11	68	-5	22	96	21	35	21	77	8	10	2	20	0	3	2	3	2	1	2	0	0	0	0	0	0	1	0	5	6	3	14	2	2	2	2	3	3	3	1	1	1	7
17	1	181	70	21.3669	3	11	12	72	-30	24	78	21	35	21	77	4	4	2	10	0	4	4	4	4	4	4	4	4	4	4	4	0	4	0	12	20	16	48	1	1	1	1	1	1	1	1	1	1	7
17	2	165	63	23.1405	3	2	6	58	-12	14	66	14	21	15	50	12	18	2	32	1	2	1	3	3	0	4	4	3	4	0	3	4	2	1	14	16	5	35	1	4	4	3	5	5	5	3	1	1	5
17	1	189	83	23.2356	3	2	8	36	-15	12	41	9	23	11	43	8	8	2	18	2	1	1	1	2	1	2	1	1	1	1	1	2	2	2	10	5	6	21	2	2	2	2	2	2	2	2	1	1	4
17	1	182	74	22.3403	3	5	12	70	-14	12	80	21	35	21	77	4	4	2	10	1	3	3	3	2	2	0	0	0	0	0	0	0	1	0	4	6	5	15	1	1	1	1	1	1	1	1	1	1	7
17	1	184	79	23.3341	3	2	11	62	-17	16	72	21	35	21	77	9	16	5	30	1	2	1	3	2	3	3	1	1	3	1	2	3	2	1	11	11	7	29	2	2	3	2	4	4	4	4	3	2	7
17	2	170	60	20.7612	3	12	12	65	-30	24	71	21	35	21	77	12	20	2	34	2	3	0	4	2	0	1	2	3	4	0	1	1	4	0	10	14	3	27	2	1	5	4	5	5	5	5	1	1	7
17	2	174	66	21.7994	2	6	11	68	-11	21	89	20	35	21	76	4	7	2	13	3	1	0	1	0	1	0	0	0	0	0	0	0	4	0	7	2	1	10	1	1	1	1	1	3	2	1	1	1	7
17	1	181	64	19.5354	2	14	7	36	-18	12	37	8	17	11	36	7	8	2	17	3	2	1	2	1	1	1	1	1	2	1	2	1	2	1	8	9	5	22	1	2	2	2	2	3	1	2	1	1	3
17	1	184	68	20.0851	3	15	8	34	-11	20	51	21	35	21	77	4	12	2	18	0	2	1	1	1	0	2	0	0	0	0	0	0	1	1	4	3	2	9	1	1	1	1	4	3	2	3	1	1	7
17	1	178	77	24.3025	3	8	4	21	-8	5	22	20	35	21	76	4	4	2	10	2	2	2	2	1	2	1	1	1	1	1	1	1	3	1	8	7	7	22	1	1	1	1	1	1	1	1	1	1	6
17	2	170	68	23.5294	3	2	11	60	-25	20	66	15	25	15	55	12	12	2	26	2	2	2	2	2	2	2	2	2	2	2	2	2	2	2	10	10	10	30	3	3	3	3	3	3	3	3	1	1	5
17	1	180	75	23.1481	3	11	12	64	-28	22	70	21	35	21	77	8	8	4	20	1	3	3	3	3	3	3	3	3	3	3	3	3	1	3	11	15	15	41	2	2	2	2	2	2	2	2	2	2	7
17	1	181	75	22.8931	3	14	10	60	-19	17	68	21	35	21	77	9	15	4	28	1	2	3	3	2	3	1	1	1	1	1	1	1	1	1	6	8	9	23	3	2	2	2	4	3	4	4	2	2	7
17	2	168	52	18.424	3	12	6	39	-16	11	40	16	32	18	66	11	12	2	25	2	3	1	2	2	1	3	3	2	3	2	2	3	3	3	13	13	9	35	2	3	3	3	3	3	3	3	1	1	5
17	1	189	83	23.2356	2	8	12	70	-7	22	97	21	35	21	77	9	9	2	20	0	0	1	2	4	1	2	4	1	0	0	0	0	2	1	8	6	4	18	1	2	3	3	1	3	3	2	1	1	7
17	2	182	66	19.9251	2	15	10	60	-25	20	65	18	35	21	74	8	12	2	22	1	2	1	2	0	0	2	1	1	1	0	3	1	1	1	5	9	3	17	2	1	3	2	3	4	3	2	1	1	7
18	1	176	68	21.9525	3	8	10	60	-25	20	65	18	30	18	66	12	12	6	30	2	2	2	2	2	2	2	2	2	2	2	2	2	2	2	10	10	10	30	3	3	3	3	3	3	3	3	3	3	6
18	1	185	82	23.9591	2	8	11	29	-25	20	35	5	17	8	30	11	13	5	29	2	3	2	3	2	3	3	0	3	3	3	3	3	1	4	11	12	15	38	3	3	4	1	3	3	4	3	3	2	2
18	2	170	64	22.1453	2	15	12	33	-10	10	45	10	22	14	46	14	15	5	34	1	2	1	3	3	3	3	2	2	2	1	2	3	3	2	13	11	9	33	2	4	4	4	4	4	4	3	2	3	4
18	1	183	82	24.4857	2	11	9	33	-21	4	25	6	18	11	35	6	11	2	19	2	2	1	2	3	1	3	3	3	3	1	2	3	3	2	14	12	8	34	1	1	3	1	3	4	1	3	1	1	3
18	2	175	70	22.8571	3	11	4	31	-25	9	19	13	24	16	53	12	13	3	28	2	3	2	3	4	2	4	2	3	3	2	2	3	4	2	17	13	11	41	3	3	3	3	3	3	3	4	2	1	4
18	1	186	77	22.2569	3	8	12	69	-5	4	80	21	35	21	77	6	14	2	22	1	3	1	2	3	2	3	1	2	2	3	2	2	1	3	10	10	11	31	1	1	3	1	3	4	3	4	1	1	7
18	1	195	81	21.3018	2	2	7	68	-13	19	81	21	35	21	77	16	16	8	40	2	2	2	2	2	2	2	2	2	2	0	2	2	3	2	11	10	8	29	4	4	4	4	4	4	4	4	4	4	7
18	1	178	75	23.6713	3	8	10	61	-18	19	72	20	33	19	72	6	5	5	16	3	3	2	1	2	1	2	1	1	3	1	2	1	1	0	9	10	5	24	1	1	2	2	1	2	1	1	2	3	6
18	1	181	70.8	21.6111	2	6	12	72	-30	24	78	21	35	21	77	4	4	2	10	4	0	0	0	0	0	0	0	0	0	0	0	0	4	0	8	0	0	8	1	1	1	1	1	1	1	1	1	1	7
18	2	176	61	19.6927	2	8	5	34	-19	17	37	5	13	19	37	6	8	2	16	1	2	0	1	2	2	1	1	0	1	2	0	1	1	0	6	5	4	15	3	1	1	1	3	3	1	1	1	1	1
18	1	175	63	20.5714	5	11	9	50	-11	14	62	19	33	21	73	6	12	4	22	1	3	2	1	4	0	3	1	1	2	1	1	2	2	1	12	8	5	25	1	1	2	2	4	3	3	2	3	1	6
18	1	174	63	20.8086	2	15	4	50	-23	8	39	21	35	21	77	4	4	2	10	0	0	0	2	0	0	0	0	0	0	0	0	0	4	0	4	2	0	6	1	1	1	1	1	1	1	1	1	1	7
18	2	171	60	20.5191	2	6	9	69	-8	24	94	19	35	19	73	12	15	2	29	1	3	3	3	2	0	3	2	0	3	0	2	2	1	1	9	13	4	26	3	2	3	4	5	3	3	4	1	1	7
18	2	177	61	19.4708	2	1	9	68	-5	19	91	19	35	20	74	9	15	2	26	2	2	2	2	1	2	2	2	1	3	2	2	1	2	0	8	11	7	26	2	2	2	3	4	4	3	4	1	1	7
18	1	181	75	22.8931	3	14	4	46	-19	10	41	13	26	12	51	12	12	6	30	2	2	2	2	2	2	2	2	2	2	2	2	2	2	2	10	10	10	30	3	3	3	3	3	3	3	3	3	3	6
18	1	177	62	19.79	3	2	12	66	-29	24	73	21	35	21	77	9	17	5	31	1	3	0	2	3	2	2	3	1	2	1	1	2	2	1	10	11	5	26	3	2	2	2	5	4	3	5	3	2	7
18	2	168	70	24.8016	4	2	7	41	-21	7	34	3	8	3	14	10	10	4	24	3	4	4	4	4	4	4	4	4	4	4	4	4	4	4	19	20	20	59	2	3	2	3	3	3	2	2	3	1	1
18	2	164	55	20.4491	3	11	6	54	-21	11	50	21	35	21	77	11	16	6	33	2	1	3	3	3	1	2	3	2	3	2	2	2	2	3	11	12	11	34	3	3	2	3	4	4	4	4	4	2	7
18	2	165	56	20.5693	3	3	10	60	-23	12	59	13	33	14	60	9	13	3	25	2	2	2	2	2	2	2	2	2	2	2	2	2	2	2	10	10	10	30	2	1	3	3	3	4	3	3	2	1	5
18	1	180	62	19.1358	2	12	11	60	-5	19	85	21	35	21	77	8	8	4	20	1	1	1	2	2	1	2	1	1	2	0	2	2	2	2	9	8	5	22	2	2	2	2	2	2	2	2	2	2	7
18	1	181	78	23.8088	3	8	11	58	-25	20	64	15	25	15	55	8	8	4	20	1	2	2	2	3	2	2	2	3	3	2	2	3	2	1	11	11	10	32	2	2	2	2	2	2	2	2	2	2	5
18	2	172	62	20.9573	2	6	10	50	-16	16	60	21	35	21	77	11	12	6	29	1	3	3	3	2	2	2	2	2	2	2	2	2	2	2	9	12	11	32	2	3	3	3	3	3	3	3	3	3	7
18	1	187	73	20.8756	3	9	12	60	-26	21	67	21	35	21	77	4	4	2	10	0	4	4	4	4	4	4	4	4	4	4	4	4	0	4	12	20	20	52	1	1	1	1	1	1	1	1	1	1	7
18	1	173	63	21.0498	3	2	7	40	-17	13	43	19	26	17	62	11	11	3	25	1	3	4	2	1	2	1	1	3	3	3	2	1	0	2	4	11	14	29	2	3	4	2	4	3	2	2	1	2	6
19	1	175	71	23.1837	2	15	11	59	-21	14	63	20	32	20	72	13	18	5	36	1	3	1	1	2	0	2	1	2	2	0	2	3	1	0	9	9	3	21	3	3	3	4	4	4	5	5	1	4	7
19	1	186	82	23.7022	2	6	11	67	-9	23	92	14	22	14	50	6	10	2	18	1	3	1	3	3	3	3	2	0	1	1	2	2	0	1	9	11	6	26	1	1	1	3	1	4	4	1	1	1	5
19	1	182	83	25.0574	3	5	12	70	-16	21	87	21	35	21	77	8	14	4	26	1	2	2	3	3	2	3	1	2	3	2	2	2	2	2	11	11	10	32	1	2	3	2	5	3	3	3	2	2	7
19	1	176	72	23.2438	3	9	12	72	-5	24	103	21	35	21	77	4	4	2	10	0	2	0	4	2	1	0	0	0	0	0	0	0	0	0	2	6	1	9	1	1	1	1	1	1	1	1	1	1	7
19	1	180	77	23.7654	2	12	4	40	-20	16	40	3	11	3	17	12	12	6	30	0	4	4	4	4	4	4	4	4	4	4	4	4	0	4	12	20	20	52	3	3	3	3	3	3	3	3	3	3	1
19	1	186	89	25.7255	2	16	7	42	-21	11	39	11	29	13	53	9	13	4	26	1	2	1	2	1	2	1	2	1	2	1	2	1	2	2	6	10	7	23	1	2	3	3	3	4	3	3	2	2	4
19	2	178	65	20.5151	3	2	4	43	-16	14	45	14	24	17	55	12	13	4	29	1	2	3	3	3	3	3	3	3	3	3	3	3	2	1	12	14	13	39	3	3	3	3	3	4	3	3	2	2	4
19	1	180	75	23.1481	3	1	12	71	-10	24	97	21	35	21	77	4	4	2	10	0	0	0	2	4	0	0	0	0	0	0	1	0	1	0	5	3	0	8	1	1	1	1	1	1	1	1	1	1	7
19	1	179	71	22.1591	3	2	10	48	-20	16	54	18	30	18	66	8	11	3	22	1	1	3	1	2	1	1	1	1	1	1	1	1	1	1	6	5	7	18	1	2	2	3	4	3	2	2	2	1	6
19	2	171	67	22.913	4	10	6	36	-15	12	39	18	35	16	69	11	11	2	24	2	2	2	2	2	2	2	2	2	2	2	2	2	2	2	10	10	10	30	2	3	3	3	3	2	2	4	1	1	7
19	2	173	61	20.3816	4	2	12	70	-30	24	76	21	35	21	77	4	4	2	10	0	4	4	4	2	4	4	4	2	2	2	2	2	2	2	10	16	14	40	1	1	1	1	1	1	1	1	1	1	7
19	1	183	83	24.7843	3	11	12	69	-30	22	73	21	35	21	77	4	4	2	10	0	4	4	4	4	4	4	4	4	4	4	4	4	0	4	12	20	20	52	1	1	1	1	1	1	1	1	1	1	7
19	2	168	57	20.1956	4	13	9	35	-15	10	39	21	35	21	77	9	9	2	20	3	1	1	1	1	1	1	1	1	1	1	1	1	3	1	9	5	5	19	2	2	3	2	2	2	2	3	1	1	7
19	1	190	85	23.5457	2	2	11	69	-5	24	99	21	35	21	77	6	11	2	19	0	3	3	2	1	0	1	1	2	3	0	1	1	1	1	4	10	6	20	1	1	2	2	3	3	3	2	1	1	7
19	1	188	70	19.8053	2	5	10	60	-19	17	68	18	30	18	66	12	12	3	27	2	2	2	2	2	2	2	2	2	2	2	2	2	2	2	10	10	10	30	4	3	2	3	3	3	3	3	1	2	6
19	1	177	63.8	20.3645	3	14	12	57	-26	22	65	21	34	21	76	8	8	3	19	1	3	3	2	1	1	1	0	3	3	3	2	1	1	1	5	10	11	26	1	3	2	2	2	1	2	3	2	1	7
19	2	172	59	19.9432	3	4	6	38	-19	14	39	17	33	18	68	8	8	4	20	2	2	2	2	2	2	2	2	2	2	2	2	2	2	2	10	10	10	30	2	2	2	2	2	2	2	2	2	2	7
19	1	185	90	26.2966	3	8	3	36	-16	13	36	15	32	15	62	11	11	2	24	2	2	2	1	1	3	1	0	3	3	3	3	3	1	1	8	9	12	29	2	3	3	3	4	3	3	1	1	1	7
19	2	178	65	20.5151	3	2	8	50	-14	22	66	14	29	15	58	10	11	4	25	1	2	1	2	2	3	2	1	1	3	4	3	3	2	2	10	11	11	32	3	2	3	2	4	4	1	2	1	3	5
19	1	188	85	24.0493	1	9	11	66	-18	24	83	17	34	21	72	7	12	3	22	0	3	0	2	0	1	0	0	0	0	0	0	0	1	0	1	5	1	7	1	1	2	3	3	4	4	1	2	1	6
19	2	171	59	20.1771	3	3	6	21	-18	8	17	9	19	16	44	6	5	2	13	1	1	4	4	2	3	3	1	2	3	4	3	2	3	2	11	12	15	38	1	2	2	1	2	1	1	1	1	1	3
19	1	176	70	22.5981	4	14	8	35	-15	13	41	21	35	21	77	8	8	4	20	3	1	1	1	1	1	1	1	1	1	1	1	1	3	1	9	5	5	19	2	2	2	2	2	2	2	2	2	2	7
19	2	171	65	22.2291	3	2	11	67	-10	6	74	17	35	20	72	12	11	4	27	1	4	3	3	3	4	4	4	4	4	4	4	3	2	4	13	19	19	51	2	3	4	3	3	2	3	3	1	3	7
19	1	180	85	26.2346	3	3	12	64	-27	22	71	21	35	21	77	20	8	2	30	0	4	4	4	4	4	4	4	4	4	4	4	4	0	4	12	20	20	52	5	5	5	5	5	1	1	1	1	1	7
19	1	183	77	22.9926	2	3	7	37	-17	14	41	15	30	20	65	16	17	2	35	3	4	3	2	2	1	1	4	4	4	4	4	3	1	3	10	18	15	43	2	4	5	5	5	5	5	2	1	1	5
19	1	182	74	22.3403	2	2	8	44	-23	18	47	18	30	18	66	4	4	2	10	4	0	0	0	0	0	0	0	0	0	0	0	0	4	0	8	0	0	8	1	1	1	1	1	1	1	1	1	1	6
19	1	184	68	20.0851	3	7	12	64	-27	23	72	21	35	21	77	4	4	2	10	4	0	0	0	0	0	0	0	0	0	0	0	0	2	2	6	0	2	8	1	1	1	1	1	1	1	1	1	1	7
19	1	181	72	21.9774	3	11	12	71	-30	24	77	21	35	21	77	12	16	2	30	0	4	4	4	4	4	4	4	4	4	4	4	4	4	0	16	20	16	52	1	5	5	1	5	5	5	1	1	1	7
19	2	167	65	23.3067	3	12	9	38	-20	16	43	17	33	18	68	13	17	3	33	1	3	3	3	3	3	3	3	4	4	3	4	3	2	3	12	17	16	45	4	3	4	2	3	5	5	4	2	1	5
19	1	186	73	21.1007	4	7	8	62	-26	21	65	18	30	18	66	8	8	4	20	3	1	1	1	4	1	1	1	1	1	1	3	1	0	0	9	7	4	20	2	2	2	2	2	2	2	2	2	2	6
19	1	180	80	24.6914	3	13	11	57	-17	16	67	19	35	21	75	6	6	2	14	2	2	2	2	2	2	2	2	2	2	2	2	2	2	1	10	10	9	29	1	1	2	2	2	2	1	1	1	1	7
19	2	165	58	21.3039	4	2	6	34	-17	18	41	13	23	12	48	11	10	4	25	3	1	2	2	2	2	1	1	2	2	1	1	2	2	2	10	7	9	26	3	2	3	3	3	3	2	2	2	2	5
19	1	180	95	29.321	3	1	12	50	-25	16	53	17	31	17	65	4	4	2	10	2	2	2	2	3	2	3	3	3	3	3	3	3	2	3	13	13	13	39	1	1	1	1	1	1	1	1	1	1	7
19	1	170	60	20.7612	3	13	12	63	-28	24	71	21	35	21	77	12	12	6	30	2	2	2	2	2	2	2	2	2	2	2	2	2	2	2	10	10	10	30	3	3	3	3	3	3	3	3	3	3	7
19	1	180	75	23.1481	4	1	12	69	-30	24	75	3	5	3	11	4	4	2	10	1	3	3	3	3	3	3	3	3	3	3	3	0	1	0	8	15	12	35	1	1	1	1	1	1	1	1	1	1	1
19	2	175	65	21.2245	2	9	12	64	-8	24	92	18	30	18	66	9	16	2	27	3	2	1	2	3	1	3	2	2	2	1	1	2	3	2	14	9	7	30	1	2	4	2	4	4	4	4	1	1	6
20	1	183	80	23.8884	3	16	8	48	-20	16	52	12	20	12	44	4	4	2	10	2	2	2	2	2	2	2	2	2	2	2	2	2	2	2	10	10	10	30	1	1	1	1	1	1	1	1	1	1	4
20	2	178	68	21.4619	2	9	8	48	-14	8	50	18	30	18	66	11	12	3	26	2	2	2	3	3	3	3	1	3	3	0	2	2	3	0	13	11	8	32	2	3	3	3	3	3	3	3	2	1	6
20	1	189	82	22.9557	2	9	9	57	-17	16	65	13	22	13	48	10	10	3	23	2	1	2	3	3	1	3	0	2	1	1	1	2	2	1	12	6	7	25	2	3	3	2	3	3	2	2	1	2	4
20	1	186	83	23.9912	3	14	12	72	-30	24	78	21	35	21	77	4	4	2	10	0	4	4	4	0	0	0	0	0	0	0	0	0	4	0	4	8	4	16	1	1	1	1	1	1	1	1	1	1	7
20	2	168	56	19.8413	4	13	11	68	-5	24	98	21	35	21	77	7	9	2	18	1	1	3	1	1	2	2	1	2	2	2	1	1	1	1	6	6	10	22	1	1	3	2	2	2	2	3	1	1	7
20	1	175	70	22.8571	2	5	4	41	-18	13	40	9	23	15	47	6	13	6	25	1	1	4	3	4	2	4	3	0	3	4	1	4	4	1	17	11	11	39	1	1	1	3	5	4	2	2	3	3	3
20	1	181	80	24.4193	4	11	10	68	-10	20	88	20	35	21	76	8	8	4	20	0	2	2	2	2	3	2	0	2	1	2	2	1	1	2	6	7	11	24	2	2	2	2	2	2	2	2	2	2	7
20	2	170	61	21.1073	2	2	6	54	-10	20	70	20	35	21	76	6	11	2	19	1	2	0	2	2	1	2	2	1	2	0	2	1	2	1	8	10	3	21	1	1	3	1	3	3	2	3	1	1	7
20	2	170	60	20.7612	1	3	12	68	-12	20	88	18	35	19	72	7	11	4	22	2	2	1	1	3	1	2	1	1	3	2	2	2	1	1	10	9	6	25	1	2	2	2	3	3	4	1	2	2	7
20	1	180	85	26.2346	3	8	8	48	-20	16	52	21	35	21	77	12	12	6	30	2	2	2	2	2	2	2	2	2	2	2	2	2	2	2	10	10	10	30	3	3	3	3	3	3	3	3	3	3	7
20	2	167	55	19.721	3	4	8	68	-13	22	85	21	35	21	77	10	12	4	26	1	2	1	2	0	1	2	1	1	2	1	2	0	0	0	3	9	4	16	3	3	2	2	3	3	3	3	3	1	7
20	1	180	79	24.3827	5	3	9	53	-19	14	57	13	25	19	57	4	4	2	10	1	3	3	3	3	3	3	3	3	4	3	3	1	3	2	11	16	14	41	1	1	1	1	1	1	1	1	1	1	5
20	1	178	70	22.0932	3	2	9	54	-16	14	61	21	33	21	75	8	12	4	24	1	3	2	3	4	2	3	2	3	3	1	2	3	4	1	15	13	9	37	2	2	2	2	2	4	3	3	2	2	7
20	2	168	60	21.2585	3	13	12	67	-19	16	76	21	35	21	77	6	4	2	12	4	0	0	0	0	0	0	0	0	0	0	0	0	1	1	5	0	1	6	2	1	2	1	1	1	1	1	1	1	7
20	2	180	80	24.6914	3	8	3	38	-16	12	37	21	35	21	77	4	4	2	10	1	2	3	1	2	1	1	1	1	1	1	1	1	1	0	6	6	6	18	1	1	1	1	1	1	1	1	1	1	7
20	1	188	75	21.22	3	1	6	59	-15	6	56	21	35	21	77	13	15	6	34	0	1	1	1	1	0	1	0	1	3	0	3	2	0	0	4	8	2	14	3	3	4	3	4	3	4	4	3	3	7
20	1	178	70	22.0932	4	2	10	72	-29	22	75	18	32	18	68	13	12	7	32	0	3	1	3	3	0	4	3	3	3	1	3	3	2	2	12	15	7	34	2	4	4	3	5	2	1	4	4	3	7
20	1	171	62	21.2031	4	16	12	72	-10	24	98	21	35	21	77	4	4	2	10	0	1	3	2	1	1	1	1	1	1	1	1	1	0	1	3	6	7	16	1	1	1	1	1	1	1	1	1	1	7
20	1	175	80	26.1224	4	14	8	59	-19	16	64	21	35	21	77	4	4	2	10	0	4	4	4	2	4	4	1	2	4	4	4	4	0	4	10	17	18	45	1	1	1	1	1	1	1	1	1	1	7
20	2	153	48	20.5049	4	2	9	58	-25	20	62	21	35	21	77	8	9	4	21	1	2	2	2	2	1	1	1	1	1	1	1	1	3	1	8	7	6	21	3	1	2	2	3	2	2	2	2	2	7
20	2	165	60	22.0386	3	17	8	34	-18	11	35	8	17	9	34	8	8	4	20	1	2	3	2	1	1	1	1	1	1	1	1	1	3	1	7	7	7	21	2	2	2	2	2	2	2	2	2	2	3
20	2	173	65	21.7181	3	2	8	66	-5	24	93	14	28	16	58	7	8	4	19	1	1	1	3	1	2	2	0	1	2	1	2	1	1	1	6	8	6	20	1	2	2	2	2	2	2	2	2	2	5
20	2	168	60	21.2585	3	3	12	67	-28	24	75	21	35	21	77	4	4	2	10	2	2	2	2	2	2	2	2	2	2	2	2	2	2	2	10	10	10	30	1	1	1	1	1	1	1	1	1	1	7
20	1	180	73	22.5309	3	8	8	42	-20	13	43	3	11	3	17	9	12	2	23	2	2	2	2	2	2	2	2	2	2	2	2	2	2	2	10	10	10	30	1	3	3	2	3	3	3	3	1	1	1
20	1	188	83	23.4835	2	2	8	54	-10	16	68	18	30	17	65	11	11	3	25	1	1	1	1	2	1	1	1	2	3	1	1	1	2	0	7	7	5	19	2	3	2	4	3	2	2	4	1	2	6
20	1	181	79	24.114	2	12	6	36	-9	6	39	8	24	14	46	11	14	8	33	2	2	2	2	2	2	2	2	2	2	2	2	2	2	2	10	10	10	30	2	2	4	3	4	4	4	2	4	4	3
20	2	156	55	22.6003	3	8	7	63	-14	22	78	15	29	18	62	7	11	2	20	1	2	2	2	2	1	1	2	1	2	1	2	2	2	1	8	10	6	24	1	2	3	1	3	3	3	2	1	1	5
20	2	165	65	23.8751	2	6	6	30	-26	15	25	8	17	11	36	12	9	2	23	3	1	3	1	3	4	2	0	3	3	4	2	1	3	1	12	7	15	34	2	3	3	4	3	2	3	1	1	1	3
20	1	184	80	23.6295	2	12	12	64	-27	24	73	16	25	21	62	10	12	8	30	0	3	3	4	4	0	4	1	1	3	2	0	3	3	0	14	11	6	31	4	1	1	4	1	1	5	5	3	5	5
20	1	180	75	23.1481	2	6	9	33	-19	14	37	5	13	10	28	17	18	2	37	1	3	2	4	3	3	2	4	4	4	3	4	4	4	2	14	19	14	47	3	4	5	5	5	5	5	3	1	1	3
20	1	180	72	22.2222	2	14	11	72	-11	24	96	21	35	21	77	6	8	2	16	4	4	4	4	4	4	2	0	1	4	4	4	1	4	4	15	16	17	48	1	1	3	1	1	5	1	1	1	1	7
20	2	170	58	20.0692	5	6	12	59	-25	21	67	21	35	21	77	4	4	2	10	0	4	4	4	0	0	0	0	0	0	0	0	0	4	0	4	8	4	16	1	1	1	1	1	1	1	1	1	1	7
20	2	169	57	19.9573	4	11	12	65	-20	20	77	13	25	15	53	8	8	4	20	2	2	2	2	2	2	2	2	2	2	2	2	2	2	2	10	10	10	30	2	2	2	2	2	2	2	2	2	2	4
20	2	182	65	19.6232	2	3	5	36	-15	12	38	19	30	19	68	10	12	4	26	1	4	1	3	2	3	1	2	2	2	3	2	1	1	2	6	13	11	30	1	3	3	3	3	3	3	3	2	2	6
20	1	171	65	22.2291	3	12	10	46	-13	11	54	17	32	21	70	9	20	2	31	0	4	0	2	1	0	4	1	2	4	0	2	1	3	0	9	13	2	24	1	1	5	2	5	5	5	5	1	1	7
20	1	182	72	21.7365	3	11	6	36	-15	12	39	12	20	12	44	12	12	6	30	2	2	2	2	2	2	2	2	2	2	2	2	2	2	2	10	10	10	30	3	3	3	3	3	3	3	3	3	3	4
20	1	178	72	22.7244	2	3	11	60	-12	24	83	21	35	21	77	11	8	2	21	1	2	4	1	2	2	4	0	2	2	2	0	4	2	0	13	5	10	28	2	3	3	3	2	2	2	2	1	1	7
20	2	161	51	19.6752	3	14	8	39	-19	9	37	14	25	17	56	14	12	4	30	2	1	2	3	1	2	3	1	1	3	1	2	2	2	0	10	10	6	26	3	3	4	4	3	3	2	4	3	1	5
20	1	176	92	29.7004	4	15	12	72	-30	24	78	21	35	21	77	10	14	4	28	0	4	4	4	4	4	4	4	4	4	4	4	4	0	4	12	20	20	52	2	2	3	3	4	3	2	5	2	2	7
20	1	183	72	21.4996	2	7	5	31	-15	12	33	12	20	12	44	8	8	4	20	3	1	1	1	1	1	1	1	1	1	1	1	1	3	1	9	5	5	19	2	2	2	2	2	2	2	2	2	2	4
20	1	190	85	23.5457	3	2	12	56	-16	20	72	21	35	20	76	12	12	4	28	2	4	3	2	1	4	3	2	1	1	4	2	3	1	0	10	11	12	33	3	2	3	4	2	4	5	1	1	3	7
20	1	181	75	22.8931	3	6	8	68	-18	22	80	21	35	21	77	12	20	5	37	0	3	4	3	4	3	3	4	4	4	4	4	4	1	4	12	18	19	49	2	3	2	5	5	5	5	5	3	2	7
20	2	178	70	22.0932	3	16	6	38	-17	12	39	15	24	15	54	12	11	4	27	1	2	2	3	3	2	2	3	1	2	2	2	2	2	1	10	12	8	30	3	3	3	3	3	3	3	2	2	2	5
20	1	177	77	24.5779	3	2	12	51	-21	15	57	10	25	12	47	9	12	6	27	2	2	2	2	2	2	2	2	2	2	2	2	2	2	2	10	10	10	30	1	1	3	4	3	3	3	3	3	3	3
20	1	181	75	22.8931	4	10	12	37	-12	11	48	21	35	21	77	4	4	2	10	4	0	0	0	0	0	0	0	1	1	0	1	0	1	1	5	2	2	9	1	1	1	1	1	1	1	1	1	1	7
20	1	188	86	24.3323	3	1	2	37	-13	7	33	19	34	20	73	17	14	7	38	1	2	3	3	2	3	2	3	3	3	2	2	2	2	3	9	13	14	36	5	4	4	4	4	4	3	3	3	4	6
20	2	169	62	21.7079	3	2	12	69	-21	14	74	12	20	12	44	12	12	2	26	2	2	2	2	2	2	2	2	2	2	2	2	2	2	2	10	10	10	30	3	3	3	3	3	3	3	3	1	1	4
20	2	168	63	22.3214	3	14	11	54	-26	22	61	3	5	3	11	4	4	2	10	4	0	0	0	0	0	0	0	0	0	0	0	0	4	0	8	0	0	8	1	1	1	1	1	1	1	1	1	1	1
21	1	172	70	23.6614	5	17	5	43	-17	13	44	12	23	19	54	11	11	5	27	2	2	2	2	2	1	2	2	2	2	2	1	2	3	1	11	9	8	28	3	3	2	3	3	2	3	3	3	2	4
21	1	167	65	23.3067	5	16	9	48	-20	16	53	19	33	18	70	8	8	4	20	2	2	2	2	3	3	2	0	2	2	2	2	2	2	2	11	8	11	30	2	2	2	2	2	2	2	2	2	2	7
21	1	193	76	20.4032	3	10	8	48	-20	16	52	15	25	15	55	4	12	2	18	2	2	2	2	2	2	2	2	2	2	2	2	2	2	2	10	10	10	30	1	1	1	1	3	3	3	3	1	1	5
21	1	188	77	21.7859	2	11	12	72	-30	24	78	21	35	21	77	7	8	4	19	2	2	2	2	2	2	2	2	2	2	2	2	2	2	2	10	10	10	30	1	2	2	2	2	2	2	2	2	2	7
21	1	186	71	20.5226	3	2	10	60	-25	20	65	18	30	18	66	8	8	2	18	0	2	2	2	1	3	1	1	3	3	3	1	1	1	1	4	9	12	25	1	2	3	2	2	2	2	2	1	1	6
21	1	180	65	20.0617	4	2	8	49	-17	12	52	21	35	21	77	4	4	2	10	1	3	3	0	1	3	1	2	4	1	1	1	1	2	1	6	7	12	25	1	1	1	1	1	1	1	1	1	1	7
21	2	172	61	20.6193	2	17	8	46	-22	16	48	12	27	18	57	8	10	2	20	2	3	2	3	3	3	2	3	3	3	2	2	2	2	2	11	14	12	37	1	2	2	3	3	3	3	1	1	1	5
21	1	189	77	21.5559	3	1	12	65	-22	16	71	21	35	21	77	4	4	2	10	2	2	2	2	2	2	2	2	2	2	2	2	2	2	2	10	10	10	30	1	1	1	1	1	1	1	1	1	1	7
21	1	194	101	26.836	3	7	12	68	-7	17	90	19	35	21	75	4	11	2	17	0	2	4	2	0	3	3	0	0	4	0	0	0	0	0	3	8	7	18	1	1	1	1	4	3	3	1	1	1	7
21	2	185	78	22.7904	3	2	11	59	-12	18	76	13	27	17	57	10	11	4	25	1	2	2	2	1	2	1	1	1	1	1	2	1	2	1	6	8	7	21	2	2	3	3	3	3	3	2	2	2	5
21	2	169	65	22.7583	4	13	8	44	-21	9	40	15	28	18	61	10	12	2	24	1	3	2	3	2	1	2	3	2	4	2	2	2	2	1	9	15	8	32	2	3	3	2	3	3	3	3	1	1	5
21	1	186	75	21.6788	3	9	7	47	-23	6	37	16	30	18	64	11	13	2	26	1	3	1	3	3	0	4	1	1	2	1	1	3	3	1	14	10	4	28	2	3	4	2	3	4	2	4	1	1	6
21	2	163	50	18.8189	5	10	11	64	-18	23	80	21	35	21	77	10	7	2	19	1	2	1	1	3	1	2	1	1	3	1	1	1	2	0	9	8	4	21	3	3	3	1	2	2	2	1	1	1	7
21	2	170	57	19.7232	3	2	4	19	-27	4	0	3	23	21	47	10	11	2	23	2	2	4	4	3	1	3	3	3	3	3	3	3	3	4	14	15	15	44	4	2	2	2	4	4	2	1	1	1	1
21	1	193	90	24.1617	3	12	4	39	-15	13	41	8	16	13	37	7	5	3	15	1	2	3	2	2	4	2	1	3	1	3	1	2	1	2	8	7	15	30	1	1	4	1	1	1	1	2	2	1	2
21	2	169	60	21.0077	3	14	10	67	-10	19	86	19	32	20	71	11	16	2	29	0	2	2	2	1	1	1	1	1	1	1	1	1	1	1	4	7	6	17	3	3	3	2	4	4	4	4	1	1	6
21	1	178	74	23.3556	3	14	10	42	-12	15	55	17	29	17	63	10	12	2	24	2	2	3	2	2	2	1	1	1	1	1	1	1	2	1	8	7	8	23	2	2	3	3	3	3	3	3	1	1	6
21	1	178	72	22.7244	2	6	12	69	-5	24	100	21	35	21	77	9	16	5	30	1	2	1	2	1	1	1	1	1	1	1	1	1	3	1	7	7	5	19	2	2	3	2	4	4	4	4	3	2	7
21	2	170	60	20.7612	2	15	9	64	-10	21	84	15	35	21	71	12	11	3	26	1	2	2	3	2	1	0	1	1	2	1	3	1	1	1	5	11	6	22	4	3	2	3	4	4	2	1	1	2	6
21	1	184	81	23.9249	2	8	8	46	-31	7	30	8	17	12	37	10	18	7	35	1	2	3	3	2	1	4	3	4	4	4	4	4	2	4	13	16	16	45	2	4	2	2	5	4	4	5	3	4	3
21	1	176	76	24.5351	2	16	11	60	-6	20	85	20	35	21	76	6	5	2	13	0	1	1	1	0	0	0	0	0	1	0	0	0	1	0	1	3	1	5	1	2	1	2	1	1	1	2	1	1	7
21	1	180	80	24.6914	4	1	12	61	-13	17	77	20	35	21	76	12	12	3	27	1	1	1	2	2	3	3	1	3	3	3	2	3	3	2	12	9	12	33	3	3	3	3	3	3	3	3	2	1	7
21	1	184	64	18.9036	3	17	12	62	-15	14	73	20	35	21	76	11	14	2	27	2	2	2	3	2	2	3	3	2	2	2	2	2	2	2	11	12	10	33	2	2	4	3	3	4	4	3	1	1	6
21	2	158.5	48	19.1066	3	6	6	36	-15	12	39	15	25	15	55	12	12	6	30	2	2	2	2	2	2	2	2	2	2	2	2	2	2	2	10	10	10	30	3	3	3	3	3	3	3	3	3	3	5
21	2	165	67	24.6097	2	4	5	31	-13	11	34	4	18	10	32	14	16	4	34	1	3	1	1	3	3	3	3	1	1	1	3	3	1	2	11	11	8	30	2	4	4	4	4	4	4	4	2	2	1
21	1	170	95	32.872	4	2	11	67	-8	24	94	21	35	21	77	14	8	2	24	0	2	4	2	1	4	1	0	1	4	4	1	1	0	1	3	9	14	26	2	2	5	5	5	1	1	1	1	1	7
21	1	184	94	27.7647	2	9	11	65	-14	7	69	16	15	16	47	5	9	2	16	1	2	3	1	3	4	4	1	4	4	3	2	4	2	3	14	10	17	41	1	2	1	1	1	1	3	4	1	1	5
21	1	187	84	24.0213	4	10	9	55	-15	20	69	21	34	20	75	10	14	2	26	1	3	2	3	2	3	2	2	3	3	3	3	3	3	3	11	14	14	39	2	3	4	1	3	4	3	4	1	1	7
21	2	180	63	19.4444	2	14	12	65	-22	8	63	10	24	12	46	8	16	4	28	1	3	3	3	3	3	3	3	3	3	3	3	3	1	3	11	15	15	41	2	2	2	2	4	3	4	5	2	2	5
21	1	188	90	25.464	2	16	10	57	-25	20	62	21	35	21	77	8	8	4	20	3	2	1	2	2	1	2	2	1	2	2	2	1	3	2	11	10	7	28	2	2	2	2	2	2	2	2	2	2	7
22	1	184	77	22.7434	2	5	12	72	-15	24	93	15	35	20	70	8	10	3	21	1	4	2	3	2	1	2	1	1	3	1	3	2	1	1	8	14	6	28	2	2	3	1	2	3	2	3	2	1	5
22	1	178	88	27.7743	4	17	12	72	-30	24	78	21	35	21	77	20	20	10	50	0	4	4	4	4	4	4	4	4	4	4	4	4	0	4	12	20	20	52	5	5	5	5	5	5	5	5	5	5	7
22	1	176	58	18.7242	1	16	7	36	-16	14	41	16	24	18	58	7	7	5	19	3	2	1	1	2	1	3	2	3	2	3	1	2	2	0	12	8	8	28	1	1	3	2	1	2	2	2	2	3	5
22	1	178	77	24.3025	3	7	10	61	-10	17	78	21	35	21	77	4	6	2	12	0	1	1	0	0	3	2	0	1	3	1	0	0	1	0	3	4	6	13	1	1	1	1	3	1	1	1	1	1	7
22	2	164	48	17.8465	4	2	7	48	-16	10	49	13	25	15	53	9	13	4	26	1	1	1	1	2	2	2	2	3	3	3	2	3	3	2	11	9	11	31	2	2	3	2	4	3	3	3	2	2	5
22	1	183	70	20.9024	2	15	12	72	-30	24	78	21	35	21	77	8	12	2	22	2	2	2	2	2	2	2	1	2	2	2	1	1	2	2	9	8	10	27	1	2	3	2	3	3	2	4	1	1	7
22	2	176	78	25.1808	2	12	12	66	-8	18	88	21	35	21	77	9	12	5	26	1	2	2	1	2	1	1	1	1	1	1	1	1	1	1	6	6	6	18	3	2	2	2	3	3	3	3	3	2	7
22	2	174	63	20.8086	2	9	6	61	-10	15	72	18	29	18	65	10	15	7	32	1	3	3	3	2	2	1	1	1	1	1	1	2	1	1	7	9	8	24	2	2	4	2	3	4	4	4	4	3	6
22	1	177	70	22.3435	4	10	11	54	-25	19	59	20	33	20	73	12	12	4	28	0	3	2	3	4	3	2	2	3	4	3	2	3	0	3	9	14	14	37	3	3	3	3	3	3	4	2	2	2	7
22	2	171	64	21.8871	2	12	10	43	-14	20	59	21	35	21	77	8	10	2	20	1	4	3	1	1	1	2	0	1	1	1	1	1	1	2	6	7	8	21	2	2	2	2	3	4	2	1	1	1	7
22	1	178	79	24.9337	2	15	12	45	-11	10	56	19	28	21	68	12	14	7	33	1	1	3	1	2	4	3	2	3	2	2	1	2	1	1	9	7	13	29	2	4	4	2	5	3	4	2	3	4	5
22	1	182	71	21.4346	4	2	10	46	-13	14	57	21	35	21	77	5	10	4	19	1	1	1	0	2	3	1	0	0	1	1	0	2	2	0	8	2	5	15	1	1	2	1	3	2	2	3	3	1	7
22	1	185	77	22.4982	2	8	3	26	-16	11	24	12	20	12	44	12	12	6	30	2	2	2	2	2	2	2	2	2	2	2	2	2	2	2	10	10	10	30	3	3	3	3	3	3	3	3	3	3	4
22	2	160	51	19.9219	3	15	10	55	-18	19	66	18	33	19	70	4	10	2	16	0	3	4	3	1	2	2	2	2	1	2	1	3	0	2	6	10	12	28	1	1	1	1	3	1	3	3	1	1	6
22	2	168	62	21.9671	3	7	7	50	-27	14	44	3	6	3	12	10	17	4	31	0	4	2	4	2	0	4	4	2	3	0	4	2	2	2	10	19	6	35	1	2	2	5	5	5	5	2	1	3	1
22	1	181	95	28.9979	3	3	6	42	-20	15	43	21	35	21	77	10	14	7	31	1	3	3	3	3	3	3	2	3	4	3	3	2	1	1	10	15	13	38	3	2	2	3	3	4	4	3	4	3	7
22	2	170	59	20.4152	1	3	7	63	-20	18	68	11	34	18	63	10	13	2	25	2	3	2	2	2	1	2	1	2	3	2	3	2	1	1	9	12	8	29	2	3	3	2	4	4	3	2	1	1	4
22	1	181	73	22.2826	4	2	6	43	-14	15	50	17	28	17	62	4	20	2	26	1	2	2	2	2	3	2	1	1	1	3	1	2	1	1	8	7	10	25	1	1	1	1	5	5	5	5	1	1	6
22	2	165	65	23.8751	4	2	7	48	-14	12	53	14	26	15	55	7	8	2	17	3	1	1	1	0	0	0	0	0	0	0	0	0	1	1	4	2	2	8	2	2	2	1	2	2	2	2	1	1	4
22	1	185	80	23.3747	3	13	12	70	-5	20	97	21	35	21	77	4	10	6	20	0	2	1	2	0	0	0	0	0	0	0	0	0	2	0	2	4	1	7	1	1	1	1	5	3	1	1	1	5	7
22	1	180	96	29.6296	4	11	4	56	-10	14	64	21	35	21	77	16	4	2	22	0	0	0	2	0	4	0	0	0	0	4	0	0	0	4	0	2	12	14	5	1	5	5	1	1	1	1	1	1	7
22	1	170	61	21.1073	5	10	7	56	-24	16	55	16	27	17	60	12	10	5	27	0	2	2	1	3	1	1	3	1	4	1	3	3	3	3	10	13	8	31	3	2	4	3	3	2	3	2	3	2	6
22	1	190	93	25.7618	2	2	5	42	-14	16	49	14	28	14	56	11	14	6	31	1	3	2	2	3	3	3	2	2	3	3	2	2	2	2	11	12	12	35	2	3	3	3	4	2	4	4	4	2	6
22	1	190	90	24.9307	4	2	12	50	-28	16	50	20	35	21	76	9	14	5	28	1	3	2	3	2	3	2	3	2	3	3	3	3	1	3	9	15	13	37	3	2	2	2	4	4	3	3	2	3	7
23	1	180	75	23.1481	5	2	12	62	-12	20	82	21	35	21	77	7	4	2	13	1	2	1	1	2	2	1	0	3	4	2	2	2	3	1	9	9	9	27	1	2	3	1	1	1	1	1	1	1	7
23	2	173	63	21.0498	2	13	10	57	-24	18	61	15	28	18	61	14	14	7	35	2	3	2	3	3	2	3	2	3	2	3	3	2	1	3	11	13	13	37	4	3	4	3	4	3	4	3	4	3	5
23	1	175	60	19.6	4	10			-18	14	46	17	13	18	48	11	12	6	29	2	2	2	2	2	1	2	2	2	2	1	2	2	3	1	11	10	7	28	3	2	3	3	3	3	3	3	3	3	5
23	2	174	72	23.7812	1	8	8	50	-14	12	56	12	15	15	42	10	8	4	22	2	2	2	2	2	2	1	3	3	3	3	2	1	2	0	8	12	10	30	3	3	2	2	2	2	2	2	2	2	3
23	2	171	64	21.8871	2	1	9	42	-12	7	46	16	30	17	63	12	15	3	30	0	2	1	3	3	0	3	2	3	2	0	2	3	2	0	11	11	4	26	3	3	2	4	4	4	3	4	2	1	5
23	1	180	72	22.2222	3	2	4	43	-15	12	44	6	10	6	22	15	13	3	31	2	2	2	2	2	2	2	2	2	2	2	2	2	2	2	10	10	10	30	5	3	5	2	4	5	3	1	2	1	2
23	2	167	55	19.721	3	9	12	48	-20	16	56	12	20	12	44	12	12	6	30	2	2	2	2	2	2	2	2	2	2	2	2	2	2	2	10	10	10	30	3	3	3	3	3	3	3	3	3	3	4
23	1	188	87	24.6152	2	9	8	39	-18	6	35	15	25	15	55	4	7	2	13	1	1	1	1	2	2	2	1	1	1	1	1	1	2	1	8	5	6	19	1	1	1	1	2	2	1	2	1	1	5
23	1	193	99	26.5779	3	2	10	41	-22	13	42	15	24	11	50	14	13	5	32	3	3	3	1	1	3	1	2	2	1	3	3	3	2	1	10	10	12	32	4	4	2	4	4	2	3	4	3	2	5
23	2	180	80	24.6914	2	8	9	48	-11	16	62	15	25	15	55	8	12	6	26	2	2	2	2	2	2	2	2	2	2	2	2	2	2	2	10	10	10	30	2	2	2	2	3	3	3	3	3	3	5
23	1	189	100	27.9947	2	9	12	60	-28	11	55	18	32	21	71	14	20	10	44	2	2	2	2	2	2	2	2	2	2	2	2	2	2	2	10	10	10	30	2	2	5	5	5	5	5	5	5	5	6
23	1	192	80	21.7014	2	14	12	52	-21	12	55	13	20	11	44	8	8	4	20	3	2	3	1	2	2	1	2	2	3	1	1	2	1	2	9	9	10	28	2	2	2	2	2	2	2	2	2	2	4
23	1	190	77	21.3296	3	14	4	34	-18	16	36	9	17	9	35	12	8	4	24	2	2	2	2	2	2	2	2	2	2	2	2	2	2	2	10	10	10	30	3	3	3	3	2	2	2	2	2	2	3
23	1	178	70	22.0932	3	2	10	59	-15	15	69	21	35	21	77	8	8	4	20	2	2	2	2	2	2	2	2	2	2	2	2	2	2	2	10	10	10	30	2	2	2	2	2	2	2	2	2	2	7
23	2	170	55	19.0311	3	14	7	33	-21	11	30	14	31	16	61	14	17	2	33	0	4	2	4	4	1	2	4	3	4	2	4	4	3	3	13	20	11	44	4	3	4	3	4	5	4	4	1	1	5
23	1	181	81	24.7245	3	15	8	56	-11	17	70	18	32	18	68	11	12	4	27	1	2	2	2	2	3	2	2	2	2	2	2	2	2	2	9	10	11	30	2	3	3	3	3	3	3	3	2	2	6
23	1	185	65	18.992	3	4	4	14	-6	22	34	21	35	21	77	4	4	2	10	1	4	4	3	2	2	2	2	1	2	1	3	2	2	1	9	14	9	32	1	1	1	1	1	1	1	1	1	1	7
24	1	183	75	22.3954	3	1	8	47	-22	13	46	16	29	18	63	8	8	4	20	2	3	2	2	3	3	3	0	0	0	0	0	0	4	0	12	5	5	22	2	2	2	2	2	2	2	2	2	2	6
24	1	175	83	27.102	3	4	10	50	-20	16	56	17	33	17	67	12	12	6	30	2	2	2	2	2	2	2	2	2	2	2	2	2	2	2	10	10	10	30	3	3	3	3	3	3	3	3	3	3	7
24	1	178	80	25.2493	3	1	12	72	-28	24	80	21	35	21	77	12	12	6	30	2	2	2	2	2	2	2	2	2	2	2	2	2	2	2	10	10	10	30	3	3	3	3	3	3	3	3	3	3	7
24	1	192	88	23.8715	2	17	12	53	-17	12	60	12	20	12	44	12	12	6	30	2	2	2	2	2	2	2	2	2	2	2	2	2	2	2	10	10	10	30	3	3	3	3	3	3	3	3	3	3	4
24	1	173	70	23.3887	3	10	12	71	-8	23	98	21	35	21	77	4	4	2	10	1	2	1	1	1	2	2	0	2	2	2	1	1	0	0	5	6	7	18	1	1	1	1	1	1	1	1	1	1	7
24	1	184	76	22.448	3	8	12	72	-10	24	98	21	35	21	77	11	14	6	31	0	0	4	0	0	0	0	0	2	0	0	0	0	0	0	0	0	6	6	2	1	3	5	5	5	1	3	3	3	7
24	2	172	67	22.6474	3	10	11	54	-6	21	80	21	35	21	77	7	6	2	15	0	2	2	2	0	2	1	0	0	0	0	0	0	0	0	1	4	4	9	1	2	3	1	2	1	1	2	1	1	7
25	1	180	74.7	23.0556	4	10	10	65	-15	14	74	21	35	21	77	7	12	4	23	1	2	1	1	1	2	3	0	2	3	2	1	1	2	1	8	7	8	23	1	1	3	2	4	3	4	1	3	1	7
25	2	173	56	18.7109	3	2	11	53	-12	6	58	18	30	18	66	6	13	2	21	1	2	3	2	3	3	1	0	1	1	1	2	2	1	2	8	7	10	25	1	1	1	3	4	4	3	2	1	1	6
25	2	170	55	19.0311	3	9	8	56	-7	18	75	21	35	21	77	11	8	2	21	1	3	3	3	1	2	2	2	2	2	2	2	2	2	2	8	12	11	31	4	3	3	1	1	3	1	3	1	1	7
25	1	181	71	21.6721	3	16	8	20	-11	11	28	3	7	3	13	7	11	5	23	0	2	2	3	2	3	3	2	3	3	3	3	3	2	2	10	13	13	36	2	2	2	1	2	3	3	3	3	2	1
26	1	170	60	20.7612	5	1	12	31	-24	7	26	13	23	16	52	9	8	4	21	1	2	1	2	2	2	3	1	2	3	2	1	1	2	1	9	9	8	26	2	2	3	2	2	2	2	2	2	2	5
26	1	190	80	22.1607	1	1	12	66	-22	18	74	18	30	18	66	12	12	6	30	2	2	2	2	2	2	2	2	2	2	2	2	2	2	2	10	10	10	30	3	3	3	3	3	3	3	3	3	3	6
26	2	158	60	24.0346	3	13	12	17	-25	9	13	14	32	18	64	16	14	2	32	3	3	1	3	2	1	3	1	3	3	3	3	3	2	3	13	13	11	37	4	4	4	4	2	4	4	4	1	1	5
26	1	188	90	25.464	4	11	12	56	-13	12	67	19	29	21	69	15	16	4	35	0	2	2	1	1	0	3	1	2	2	0	1	2	2	1	8	7	5	20	4	4	4	3	5	4	3	4	2	2	6
26	1	190	85	23.5457	3	1	12	71	-29	24	78	21	35	21	77	12	12	6	30	0	4	4	4	4	4	4	4	4	4	4	4	4	0	4	12	20	20	52	3	3	3	3	3	3	3	3	3	3	7
26	1	191	90	24.6704	2	13	12	64	-10	20	86	21	35	21	77	6	10	4	20	3	1	1	1	2	1	1	1	1	1	1	1	1	3	0	10	5	4	19	1	1	2	2	3	2	2	3	3	1	7
26	1	185	80	23.3747	3	10	12	68	-28	22	74	18	30	18	66	4	4	2	10	1	3	3	3	3	3	3	3	3	3	3	3	3	1	3	11	15	15	41	1	1	1	1	1	1	1	1	1	1	6
27	1	187	85	24.3072	2	9	12	71	-18	13	78	21	35	21	77	13	11	2	26	0	3	1	3	1	2	3	1	3	3	3	3	3	1	1	8	13	10	31	2	4	4	3	4	3	2	2	1	1	7
27	1	174	85	28.075	5	12	6	49	-17	14	52	21	34	20	75	10	14	4	28	2	2	1	1	2	3	3	1	2	2	1	1	1	2	0	10	7	7	24	1	3	3	3	3	3	4	4	2	2	7
27	2	165	72	26.4463	4	13	10	34	-13	6	37	12	35	13	60	11	12	2	25	2	2	3	3	3	1	2	2	2	2	2	2	2	2	2	11	11	10	32	2	3	3	3	3	3	3	3	1	1	5
28	1	179	76	23.7196	5	12	8	48	-20	15	51	18	30	18	66	12	12	6	30	1	3	3	3	3	3	3	1	1	1	2	3	1	1	1	9	11	10	30	3	3	3	3	3	3	3	3	3	3	6
28	1	192	80	21.7014	4	7	10	66	-27	17	66	17	35	20	72	9	10	3	22	1	3	3	3	3	3	1	1	1	3	2	1	1	2	2	8	11	11	30	2	2	3	2	3	3	3	1	1	2	7
28	2	173	65	21.7181	3	5	12	60	-14	15	73	14	31	19	64	11	11	4	26	1	2	2	2	2	3	1	2	3	3	3	2	1	2	2	7	11	13	31	1	3	4	3	4	2	2	3	3	1	6
28	2	163	60	22.5827	4	8	9	35	-15	16	45	18	35	20	73	10	13	6	29	1	2	4	3	2	2	2	3	3	3	2	2	2	0	3	7	13	14	34	2	3	3	2	3	4	3	3	4	2	6
29	2	160	60	23.4375	4	8	12	71	-10	24	97	21	35	21	77	10	14	3	27	0	2	4	2	2	1	1	1	1	1	0	0	0	0	0	3	6	6	15	2	2	3	3	4	3	3	4	2	1	7
30	1	175	81	26.449	3	7	10	47	-18	13	52	10	27	12	49	10	10	6	26	1	2	2	1	2	3	3	3	3	3	3	2	3	1	2	10	11	13	34	3	2	3	2	3	2	2	3	4	2	3
30	2	158	60	24.0346	5	1	3	68	-30	24	65	18	30	18	66	16	16	8	40	1	3	3	3	3	3	3	3	3	3	3	3	3	1	3	11	15	15	41	4	4	4	4	4	4	4	4	4	4	6
[truncated: 42 more columns]
